# Supplementary material
Source: PubMed Central journal article supplement (PMC7261633)

## SUPPLEMENTAL MATERIAL

### Detailed Methods

#### Access rate

To calculate rate of access to transplantation at center  $j$ , we first identified the length of time ( $T_j$ ) for which we had data on the center by the earliest waitlist ID start date to the latest waitlist ID end date. Next, for each candidate waitlist ID and center, we calculated the length of time the candidate was waiting at the center ( $t_{ij}$ ) and the proportion of time waiting at the center ( $p_{ij} = t_{ij}/T_j$ ). The access rate for center  $j$  was defined as the number of transplants ( $N_j$ ) divided by the sum of the proportion of time candidates were waiting:  $r_j = N_j/\sum_i(p_{ij})$ .

The access rate and the transplant rate (as defined by the Scientific Registry for Transplant Recipients) are quite similar in nature. In fact, if calculated by year, they would be equivalent. Our calculation of access rate aimed to capture as much information as possible on each center while mitigating any potential bias due to the limited 'snapshot' of data we received; thus, we calculated access rate over the length of time for which we have data from the center taking into account proportion of time waiting over that time period.

#### Elastic net

For each of the outcomes, we considered a range of the elastic net mixing parameter ( $\alpha$ ): 0.2, 0.4, ..., 0.8 and for each mixing parameter ( $\alpha$ ), we performed 5-fold cross validation to select the optimal tuning parameter based on the minimal mean squared error (MSE) ( $\lambda.min$ ). To select the optimal mixing parameter ( $\alpha$ ), we chose the  $\alpha$  that achieved the lowest mean 5-fold cross-validation error at the optimal tuning parameter ( $\lambda.min$ ).

To determine the 15 most predictive characteristics for an outcome, all characteristics were standardized before the analyses so that the resulting coefficients could be directly compared. We ranked characteristics based on the absolute value of the elastic net coefficients to determine their relative importance for predicting each outcome of interest.

#### Ridge regression

Similar to the elastic net model, the glmnet [1] ridge regression tuning parameter ( $\lambda.min$ ) was chosen based on the lowest mean 5-fold cross-validation error, and all characteristics were standardized before analysis so the resulting coefficients could be directly compared. If a center had less than 10 observations in either of the dichotomous outcomes (e.g., < 10 offers accepted or < 10 offers rejected) or similarly, for modeling the organ sequence number, if the center performed less than 20 transplants, the center was excluded from the analysis.

#### Decision tree analysis

The conditional inference trees were implemented with the partykit package [2] in R. We limited the size and depth of the conditional inference trees as follows: in modeling offer acceptance, we specified a Bonferonni test with  $\alpha = 0.00001$ . In modeling organ acceptance and organ sequence number, we specified a Bonferonni test and the minbucket parameter (minimum sum of weights in a terminal node) to be 1% of the total number of observations.

#### Map figure methods

To construct the map figures, we used the sheet titled “Table G1” in the OSR data spreadsheet downloaded from <https://www.srtr.org/reports-tools/opo-specific-reports/>, named `osr_final_tables1808.xlsx` [3]. The OPO codes, State Names, County Names, and County FIPS from this sheet were merged with data from this study and then, using the County FIPS, merged with county data (`zip_data`) from the `noncensus` package in R [4] and then finally merged with US county data from the `mapdata` package in R [5], which contains state (region), county (subregion), long and lat coordinates. The figures were created using `geom_polygon` and `coord_map` functions in `ggplot2` [6].

To create the map figure of the median organ sequence numbers we only used data from donor hearts that were ultimately accepted. For each OPO, we calculated the median organ sequence number. OPOs were excluded from this figure, and shaded gray, if there were less than 20 transplants for that OPO in the data. OPOs excluded were HIOP, NMOP, NVLV, NYAP, NYWN, OHLC, and OHOV. The median organ sequence numbers were then merged with the county map data to construct the figure. Median organ sequence numbers across OPOs ranged from 1 to 8 and the median organ sequence number for Alaska (WALC) was 3 (not shown).

## REFERENCES

1. Friedman J, Hastie, T, Tibshirani R. Regularization Paths for Generalized Linear Models via Coordinate Descent. *Journal of Statistical Software* 2010; 33 (1) 1-22.
2. Hothorn T, Zeileis A. `partykit`: A Modular Toolkit for Recursive Partitioning in R. *Journal of Machine Learning Research* 2015; 16: 3905-3909.
3. Scientific Registry of Transplant Recipients. (2018). OSR data (`osr_final_tables1808.xlsx`) [Excel spreadsheet]. Retrieved from [https://www.srtr.org/media/1314/osr\\_final\\_tables1808.xlsx](https://www.srtr.org/media/1314/osr_final_tables1808.xlsx)
4. John A. Ramey (2014). `noncensus`: U.S. Census Regional and Demographic Data. R package version 0.1. <https://CRAN.R-project.org/package=noncensus>
5. Original S code by Richard A. Becker and Allan R. Wilks. R version by Ray Brownrigg. (2018). `mapdata`: Extra Map Databases. R package version 2.3.0. <https://CRAN.R-project.org/package=mapdata>
6. H. Wickham. `ggplot2`: Elegant Graphics for Data Analysis. Springer-Verlag New York, 2016.

**Supplemental Table 1:** Refusal codes associated with offer exclusion

| <b>Excluded from this study (yes/no)</b> | <b>Percentage refused with code</b> | <b>Refusal code</b> | <b>Refusal description</b>                                                                                                                                                                                                                |
|------------------------------------------|-------------------------------------|---------------------|-------------------------------------------------------------------------------------------------------------------------------------------------------------------------------------------------------------------------------------------|
| no                                       | 66.9                                | 830                 | Donor age, hypertension, prolonged hypotension, high vasopressor/ medication dosage, cardiac arrest, evidence of infection/positive cultures, non-heart beating, etiology of death, donor unstable, donor diabetes, other medical history |
| no                                       | 16.3                                | 831                 | Donor too large or small, weight incompatible with potential recipient                                                                                                                                                                    |
| no                                       | 2.9                                 | 833                 | CDC high risk donor or other reasons related to social history                                                                                                                                                                            |
| no                                       | 1.2                                 | 834                 | CMV, HBV, HCV, HIV, HTLV, VDRL, etc. donor testing is positive                                                                                                                                                                            |
| no                                       | 0.4                                 | 835                 | Method/quality of preservation, length of cold ischemic time, length of warm ischemic time                                                                                                                                                |
| no                                       | 0.7                                 | 836                 | Surgical damage, non-surgical trauma, diseased organ, organ vasculature, en bloc kidneys or any other anatomical reason                                                                                                                   |
| no                                       | 8.2                                 | 837                 | Testing unavailable, not done or unacceptable, abnormal biopsy, or other organ-specific reason                                                                                                                                            |
| no                                       | 0                                   | 883                 | Organ Center uses this code for centers that were not offered an organ because their minimum acceptance criteria excluded their potential recipients. [OC use only – does not appear on user list]                                        |
| no                                       | 1.1                                 | 898                 | Use only if the refusal reason does not fit the above categories. Be sure to write in the other reason, UNOS staff will review the OTHER reason and may recode if necessary.                                                              |
| no                                       | 0                                   | 921                 | Donor Quality                                                                                                                                                                                                                             |
| no                                       | 0                                   | 922                 | Donor Age                                                                                                                                                                                                                                 |
| no                                       | 0                                   | 923                 | Donor Size/Weight                                                                                                                                                                                                                         |
| no                                       | 0                                   | 924                 | Donor ABO                                                                                                                                                                                                                                 |
| no                                       | 0                                   | 925                 | Donor Social History                                                                                                                                                                                                                      |
| no                                       | 0                                   | 926                 | Positive Serological Tests                                                                                                                                                                                                                |
| no                                       | 0                                   | 927                 | Organ Preservation                                                                                                                                                                                                                        |
| no                                       | 0                                   | 928                 | Organ Anatomical Damage or Defect                                                                                                                                                                                                         |
| no                                       | 0                                   | 950                 | Heart: Cardiac function test results unavailable, not done or unacceptable                                                                                                                                                                |
| no                                       | 0                                   | 951                 | Heart: Abnormal Echocardiogram                                                                                                                                                                                                            |
| no                                       | 0                                   | 952                 | Heart: Abnormal Coronary Angiography                                                                                                                                                                                                      |
| no                                       | 0                                   | 953                 | Heart: Abnormal EKG results                                                                                                                                                                                                               |

|     |    |     |                                                                                                                                                             |
|-----|----|-----|-------------------------------------------------------------------------------------------------------------------------------------------------------------|
| no  | 0  | 954 | Heart: Abnormal Hemodynamics                                                                                                                                |
| no  | 0  | 991 | Donor Medical Urgency                                                                                                                                       |
| no  | 0  | 997 | Not offered - Min acceptance criteria not met - OC use only                                                                                                 |
| no  | 0  | 998 | Other: Other Specify                                                                                                                                        |
| yes | NA | 800 | Potential recipient's condition has improved and transplant is currently unnecessary                                                                        |
| yes | NA | 801 | Potential recipient too sick to attempt transplant at the time of offer, cannot be located, refused transplant, or is temporarily unsuitable for transplant |
| yes | NA | 802 | Either the potential recipient requires a multiple organ transplant or an organ of a different laterality is required (i.e., right lung is specified)       |
| yes | NA | 803 | Patient transplanted, transplant in progress, or other offer being considered                                                                               |
| yes | NA | 810 | Crossmatch results between donor and potential recipient positive                                                                                           |
| yes | NA | 811 | Number of HLA mismatches between donor and potential recipient unacceptable                                                                                 |
| yes | NA | 812 | No serum for crossmatching                                                                                                                                  |
| yes | NA | 813 | Donor has HLA antigens that are unacceptable to the potential recipient                                                                                     |
| yes | NA | 814 | Potential recipient has high PRA and most likely would have a positive crossmatch                                                                           |
| yes | NA | 815 | Potential recipient is highly sensitized and most likely would have positive crossmatch                                                                     |
| yes | NA | 820 | Program unable to accept an organ at this time due to heavy workload                                                                                        |
| yes | NA | 821 | Transplant center refused due to transportation, logistics, distance, inclement weather issues, or unable to travel for procurement                         |
| yes | NA | 822 | Response was not received from center within the one-hour time period specified in policy                                                                   |
| yes | NA | 823 | Surgeon unavailable to perform transplant procedure                                                                                                         |
| yes | NA | 824 | Too far for the organ recovery team to travel or too far to ship                                                                                            |
| yes | NA | 825 | Transplant center refused due to transportation, logistics, inclement weather issues, or unable to travel for procurement                                   |
| yes | NA | 832 | Donor ABO group incompatible / unacceptable [Only available for LIVER offers; will not display for other organ types]                                       |
| yes | NA | 850 | Potential recipient was bypassed for priority multi-organ transplant                                                                                        |

|     |    |     |                                                                                                                                                                                                                                                                                                                                                                     |
|-----|----|-----|---------------------------------------------------------------------------------------------------------------------------------------------------------------------------------------------------------------------------------------------------------------------------------------------------------------------------------------------------------------------|
| yes | NA | 851 | Potential recipient was bypassed because the donation was directed to a specific recipient.                                                                                                                                                                                                                                                                         |
| yes | NA | 852 | Potential recipient was bypassed because the organ was from a military donor and was directed to a military recipient.                                                                                                                                                                                                                                              |
| yes | NA | 853 | Potential recipient was bypassed due to the OPO's OPTN-approved alternative local unit, sharing agreement, or variance                                                                                                                                                                                                                                              |
| yes | NA | 860 | Center bypassed potential recipient due to the urgent medical needs of another potential recipient. (Requires written verification by the transplant program to UNOS Policy Compliance Department.) (Also requires written verification by OPO to UNOS Policy Compliance Department; this bypass and narrative justification will be shared with bypassed centers.) |
| yes | NA | 861 | OPO bypassed potential recipient due to transportation logistics, including distance in relation to ischemic time or weather conditions. (Requires written verification by OPO to UNOS Policy Compliance Department; this bypass and narrative justification will be shared with bypassed centers.)                                                                 |
| yes | NA | 862 | Potential recipient was bypassed due to urgent donor organ placement. (Requires written verification by OPO to UNOS Policy Compliance Department; this bypass and narrative justification will be shared with bypassed centers.)                                                                                                                                    |
| yes | NA | 863 | Potential recipient bypassed as a result of offer(s) made during an expedited placement attempt. This includes offers of expanded donor organs, OR time constraints or family time constraints. (Requires written verification by OPO to UNOS Policy Compliance Department; this bypass and narrative justification will be shared with bypassed centers.)          |
| yes | NA | 880 | Potential recipient was bypassed in order to place the kidney with the extra-renal organ recipient from the same donor.                                                                                                                                                                                                                                             |
| yes | NA | 881 | Potential recipient was bypassed and not offered an organ because the policy requirement was satisfied prior to this sequence number (e.g., non-local 0 mismatches; non-local CPRA 99+ patients)                                                                                                                                                                    |
| yes | NA | 882 | Organ Center uses this code for non-facilitated pancreas center refusals when a facilitated pancreas is offered. [OC use only – does not appear on user list]                                                                                                                                                                                                       |

|     |    |     |                                                                                                                                                |
|-----|----|-----|------------------------------------------------------------------------------------------------------------------------------------------------|
| yes | NA | 884 | No kidney available - bypass KP candidates                                                                                                     |
| yes | NA | 901 | Recipient Ill                                                                                                                                  |
| yes | NA | 902 | Recipient Unavailable                                                                                                                          |
| yes | NA | 903 | Recipient Refused                                                                                                                              |
| yes | NA | 904 | Multiple Organ Transplant Required                                                                                                             |
| yes | NA | 905 | Recipient Transplanted/Inactive                                                                                                                |
| yes | NA | 906 | Positive Crossmatch                                                                                                                            |
| yes | NA | 907 | HLA mismatch unacceptable                                                                                                                      |
| yes | NA | 908 | Recipient testing results unavailable                                                                                                          |
| yes | NA | 909 | Patient condition improved, transplant not needed                                                                                              |
| yes | NA | 910 | Recipient Medical Urgency - recipient bypassed due to medical urgency of another recipient                                                     |
| yes | NA | 911 | Heavy workload - program unable to accept an organ at this time due to heavy workload                                                          |
| yes | NA | 912 | Operational - transportation, logistics, distance, exceeded one hour response time or placement time constrains related to organ ischemic time |
| yes | NA | 913 | Surgeon Unavailable - surgeon currently performing                                                                                             |
| yes | NA | 992 | Other: Multi-organ Transplant                                                                                                                  |
| yes | NA | 993 | Other: Directed Donation                                                                                                                       |
| yes | NA | 994 | Other: Military Donor                                                                                                                          |
| yes | NA | 995 | Other: ALU, Sharing Agreement, Variance                                                                                                        |
| yes | NA | 996 | Other: Extra-renal placed with Kidney                                                                                                          |

NA: not applicable, HLA: human leukocyte antigen, CMV: cytomegalovirus, HBV: hepatitis B virus, HIV: human immunodeficiency virus, HTLV: human T-lymphotropic virus, VDRL: venereal disease research laboratory, OPO: organ procurement organization, OPTN: organ procurement and transplantation network, CPRA: calculated panel of reactive antibodies, KP: kidney pancreas, EKG: electrocardiogram

**Supplemental Table 2A:** Standardized coefficients and rankings for all candidate and donor characteristics predictive of donor heart *offer* acceptance

| <b>Characteristic</b>                | <b>Standardized coefficient</b> | <b>Rank (Importance)</b> |
|--------------------------------------|---------------------------------|--------------------------|
| (Intercept)                          | -5.75                           | 0                        |
| Candidate days waiting               | -1.13                           | 1                        |
| Candidate days on status 1B          | -1.065                          | 2                        |
| Donor age                            | -0.785                          | 3                        |
| Candidate days on status 2           | -0.606                          | 4                        |
| Candidate days on status 1A          | -0.501                          | 5                        |
| Candidate BMI                        | -0.386                          | 6                        |
| Donor/Candidate weight ratio         | -0.359                          | 7                        |
| Donor LV EF greater than 50          | 0.341                           | 8                        |
| Candidate blood type O               | 0.33                            | 9                        |
| Donor weight                         | 0.327                           | 10                       |
| Candidate unknown cigarette use      | 0.312                           | 11                       |
| Candidate weight                     | 0.293                           | 12                       |
| Candidate height                     | -0.29                           | 13                       |
| Candidate/Donor weight mismatch      | -0.275                          | 14                       |
| Donor LV EF 50 or less               | -0.27                           | 15                       |
| Donor height                         | 0.26                            | 16                       |
| Donor BUN                            | -0.247                          | 17                       |
| Donor COD was head trauma            | 0.212                           | 18                       |
| Donor blood type O                   | -0.208                          | 19                       |
| Candidate/Donor no sex mismatch      | 0.195                           | 20                       |
| Candidate/Donor sex mismatch         | -0.195                          | 21                       |
| Candidate blood type A               | -0.164                          | 22                       |
| Center volume high                   | 0.148                           | 23                       |
| Donor had PHS risk factors           | -0.142                          | 24                       |
| Donor history of hypertension        | -0.13                           | 25                       |
| Donor history of diabetes > 10 years | -0.129                          | 26                       |
| Candidate blood type AB              | -0.124                          | 27                       |
| Donor blood type A                   | 0.113                           | 28                       |
| Donor did not have PHS risk factors  | 0.107                           | 29                       |
| Donor no history of diabetes         | 0.09                            | 30                       |
| Donor no history of hypertension     | 0.087                           | 31                       |
| Donor COD was anoxia                 | -0.079                          | 32                       |
| Donor history of cigarette use       | -0.079                          | 33                       |
| Donor race Multiracial               | -0.071                          | 34                       |
| Candidate male                       | -0.068                          | 35                       |

|                                                       |        |    |
|-------------------------------------------------------|--------|----|
| Candidate female                                      | 0.067  | 36 |
| Donor no history of MI                                | 0.066  | 37 |
| Donor LV EF unknown                                   | -0.061 | 38 |
| Donor history of cocaine use                          | -0.06  | 39 |
| Donor history of diabetes 6-10 years                  | -0.058 | 40 |
| Donor blood type AB                                   | 0.058  | 41 |
| Donor unknown history of diabetes                     | 0.053  | 42 |
| Donor female                                          | -0.051 | 43 |
| Donor male                                            | 0.049  | 44 |
| Donor COD was CNS tumor                               | -0.048 | 45 |
| Candidate age at listing                              | 0.046  | 46 |
| Donor BMI                                             | -0.045 | 47 |
| Donor no history of cigarette use                     | 0.044  | 48 |
| Center volume low                                     | -0.036 | 49 |
| Candidate unknown history of diabetes                 | -0.035 | 50 |
| Candidate and Donor not identical blood type          | -0.035 | 51 |
| Candidate unknown if prior cardiac surgery at listing | -0.034 | 52 |
| Donor given pre-recovery steroids                     | 0.029  | 53 |
| Donor last serum sodium value                         | 0.026  | 54 |
| Candidate no prior cardiac surgery at listing         | 0.026  | 55 |
| Donor unknown history of MI                           | -0.026 | 56 |
| Donor COD other                                       | -0.026 | 57 |
| Donor race Black                                      | -0.025 | 58 |
| Candidate race Asian                                  | 0.025  | 59 |
| Center volume medium                                  | -0.023 | 60 |
| Candidate unknown pulmonary hypertension              | -0.021 | 61 |
| Candidate race Hispanic                               | 0.016  | 62 |
| Donor race Native Hawaiian/other Pacific Islander     | -0.015 | 63 |
| Donor given pre-recovery thyroxine                    | -0.014 | 64 |
| Candidate had no history of diabetes                  | 0.011  | 65 |
| Donor race Hispanic                                   | 0.011  | 66 |
| Donor not given pre-recovery steroids                 | -0.011 | 67 |
| Candidate race Multiracial                            | 0.011  | 68 |
| Candidate no pulmonary hypertension                   | 0.01   | 69 |
| Donor history of diabetes unknown years               | -0.01  | 70 |
| Candidate history of diabetes unknown years           | 0.01   | 71 |
| Donor blood type B                                    | 0.008  | 72 |
| Donor no history heavy alcohol use                    | -0.007 | 73 |
| Donor no history of cocaine use                       | 0.007  | 74 |
| Donor creatinine                                      | -0.006 | 75 |



|                                                       |        |     |
|-------------------------------------------------------|--------|-----|
| Donor unknown if given pre-recovery thyroxine         | 0.006  | 76  |
| Donor total bilirubin                                 | -0.005 | 77  |
| Candidate cigarette use                               | -0.005 | 78  |
| Donor PHS risk factors unknown                        | 0.004  | 79  |
| Donor unknown if given pre-recovery steroids          | -0.004 | 80  |
| Candidate race Native Hawaiian/other Pacific Islander | 0.002  | 81  |
| Candidate history of diabetes > 10 years              | -0.002 | 82  |
| Candidate race Native American/Alaska Native          | -0.002 | 83  |
| Donor race Asian                                      | -0.002 | 84  |
| Donor unknown history of heavy alcohol use            | 0.001  | 85  |
| Donor race Native American/Alaska Native              | 0      | 86  |
| Candidate race Black                                  | 0      | 87  |
| Candidate history of diabetes 6-10 years              | 0      | 88  |
| Center volume very low                                | 0      | 89  |
| Donor COD was cerebrovascular/stroke                  | 0      | 90  |
| Donor race White                                      | 0      | 91  |
| Donor unknown history of cigarette use                | 0      | 92  |
| Donor unknown history of hypertension                 | 0      | 93  |
| Donor history of diabetes 0-5 years                   | 0      | 94  |
| Donor unknown history of cocaine use                  | 0      | 95  |
| Donor history of MI                                   | 0      | 96  |
| Donor not given pre-recovery thyroxine                | 0      | 97  |
| Donor history of heavy alcohol use                    | 0      | 98  |
| Candidate race White                                  | 0      | 99  |
| Candidate blood type B                                | 0      | 100 |
| Candidate prior cardiac surgery at listing            | 0      | 101 |
| Candidate history of diabetes 0-5 years               | 0      | 102 |
| Candidate no cigarette use                            | 0      | 103 |
| Candidate and Donor identical blood type              | 0      | 104 |
| Candidate hypertension                                | 0      | 105 |

LV: left ventricular, EF: ejection fraction, COD: cause of death, BMI: body mass index, PHS: public health service, MI: myocardial infarction, CNS: central nervous system

**Supplemental Table 2B:** Standardized coefficients and rankings for all donor and transplant center characteristics predictive of donor heart *organ* acceptance

| <b>Characteristic</b>                             | <b>Standardized coefficient</b> | <b>Rank (Importance)</b> |
|---------------------------------------------------|---------------------------------|--------------------------|
| (Intercept)                                       | 0.278                           | 0                        |
| Donor age                                         | -0.710                          | 1                        |
| Donor LV EF greater than 50                       | 0.588                           | 2                        |
| Donor height                                      | 0.262                           | 3                        |
| Donor COD was head trauma                         | 0.179                           | 4                        |
| Donor had PHS risk factors                        | -0.166                          | 5                        |
| Donor history of hypertension                     | -0.166                          | 6                        |
| Donor blood type AB                               | -0.161                          | 7                        |
| Donor blood type O                                | 0.139                           | 8                        |
| Donor LV EF unknown                               | -0.108                          | 9                        |
| Donor history of cigarette use                    | -0.103                          | 10                       |
| Donor race Multiracial                            | -0.087                          | 11                       |
| Donor blood type B                                | -0.071                          | 12                       |
| Donor BUN                                         | -0.071                          | 13                       |
| Donor no history of MI                            | 0.066                           | 14                       |
| Donor history of diabetes > 10 years              | -0.065                          | 15                       |
| Donor male                                        | 0.062                           | 16                       |
| Donor no history of diabetes                      | 0.061                           | 17                       |
| Donor history of diabetes 6-10 years              | -0.057                          | 18                       |
| Donor BMI                                         | 0.054                           | 19                       |
| Donor female                                      | -0.044                          | 20                       |
| Donor total bilirubin                             | -0.033                          | 21                       |
| Donor unknown history of diabetes                 | 0.030                           | 22                       |
| Donor history of diabetes unknown years           | -0.029                          | 23                       |
| Donor creatinine                                  | -0.025                          | 24                       |
| Donor last serum sodium value                     | 0.025                           | 25                       |
| Donor race Native Hawaiian/other Pacific Islander | -0.024                          | 26                       |
| Donor no history of cigarette use                 | 0.022                           | 27                       |
| Donor no history of cocaine use                   | 0.020                           | 28                       |
| Donor given pre-recovery steroids                 | 0.019                           | 29                       |
| Donor COD was anoxia                              | -0.018                          | 30                       |
| Donor unknown if given pre-recovery steroids      | -0.015                          | 31                       |
| Donor race Asian                                  | -0.014                          | 32                       |
| Donor race White                                  | 0.012                           | 33                       |

|                                               |        |    |
|-----------------------------------------------|--------|----|
| Donor history of cocaine use                  | -0.012 | 34 |
| Donor race Black                              | -0.010 | 35 |
| Donor no history of hypertension              | 0.010  | 36 |
| Donor race Native American/Alaska Native      | -0.009 | 37 |
| Donor COD other                               | -0.006 | 38 |
| Donor no history heavy alcohol use            | -0.006 | 39 |
| Donor COD was CNS tumor                       | 0.005  | 40 |
| Donor history of MI                           | -0.003 | 41 |
| Donor unknown history of heavy alcohol use    | 0.001  | 42 |
| Donor weight                                  | 0.000  | 43 |
| Donor COD was cerebrovascular/stroke          | 0.000  | 44 |
| Donor race Hispanic                           | 0.000  | 45 |
| Donor blood type A                            | 0.000  | 46 |
| Donor unknown history of cigarette use        | 0.000  | 47 |
| Donor unknown history of hypertension         | 0.000  | 48 |
| Donor history of diabetes 0-5 years           | 0.000  | 49 |
| Donor unknown history of cocaine use          | 0.000  | 50 |
| Donor unknown history of MI                   | 0.000  | 51 |
| Donor not given pre-recovery steroids         | 0.000  | 52 |
| Donor not given pre-recovery thyroxine        | 0.000  | 53 |
| Donor given pre-recovery thyroxine            | 0.000  | 54 |
| Donor unknown if given pre-recovery thyroxine | 0.000  | 55 |
| Donor did not have PHS risk factors           | 0.000  | 56 |
| Donor PHS risk factors unknown                | 0.000  | 57 |
| Donor history of heavy alcohol use            | 0.000  | 58 |
| Donor LV EF 50 or less                        | 0.000  | 59 |

LV: left ventricular, EF: ejection fraction, COD: cause of death, BMI: body mass index, PHS: public health service, MI: myocardial infarction, CNS: central nervous system

**Supplemental Table 2C:** Standardized coefficients and rankings for all donor characteristics predictive of *organ sequence number*

| <b>Characteristic</b>                        | <b>Standardized coefficient</b> | <b>Rank (Importance)</b> |
|----------------------------------------------|---------------------------------|--------------------------|
| (Intercept)                                  | 2.311                           | 0                        |
| Recipient days waiting                       | -0.329                          | 1                        |
| Recipient days on status 2                   | 0.316                           | 2                        |
| Center volume high                           | 0.316                           | 3                        |
| Donor blood type O                           | 0.208                           | 4                        |
| Donor ischemic time 4 or more hours          | 0.182                           | 5                        |
| Recipient age at listing                     | 0.175                           | 6                        |
| Donor age                                    | 0.158                           | 7                        |
| Recipient blood type AB                      | -0.155                          | 8                        |
| Donor height                                 | -0.137                          | 9                        |
| Donor ischemic time < 4 hours                | -0.131                          | 10                       |
| Donor BMI                                    | 0.128                           | 11                       |
| Donor COD was head trauma                    | -0.127                          | 12                       |
| Donor race Hispanic                          | -0.117                          | 13                       |
| Recipient unknown hypertension status        | -0.113                          | 14                       |
| Recipient blood type B                       | -0.104                          | 15                       |
| Recipient and Donor identical blood type     | -0.084                          | 16                       |
| Donor history of cocaine use                 | 0.082                           | 17                       |
| Donor had PHS risk factors                   | 0.071                           | 18                       |
| Recipient and Donor not identical blood type | 0.070                           | 19                       |
| Recipient prior cardiac surgery at listing   | 0.064                           | 20                       |
| Donor creatinine                             | 0.057                           | 21                       |
| Recipient race Hispanic                      | -0.052                          | 22                       |
| Donor no history of cigarette use            | -0.050                          | 23                       |
| Donor COD was CNS tumor                      | 0.045                           | 24                       |
| Recipient BMI                                | 0.044                           | 25                       |
| Center volume low                            | -0.044                          | 26                       |
| Recipient history of diabetes unknown years  | -0.043                          | 27                       |
| Donor history of diabetes > 10 years         | 0.042                           | 28                       |
| Donor history of heavy alcohol use           | -0.042                          | 29                       |
| Recipient race Asian                         | -0.041                          | 30                       |
| Donor did not have PHS risk factors          | -0.037                          | 31                       |
| Donor female                                 | 0.037                           | 32                       |
| Donor total bilirubin                        | -0.037                          | 33                       |

|                                                       |        |    |
|-------------------------------------------------------|--------|----|
| Recipient male                                        | -0.037 | 34 |
| Recipient race Native Hawaiian/other Pacific Islander | -0.033 | 35 |
| Donor male                                            | -0.032 | 36 |
| Donor blood type AB                                   | -0.031 | 37 |
| Donor race Asian                                      | -0.030 | 38 |
| Donor unknown history of MI                           | -0.030 | 39 |
| Donor history of diabetes 6-10 years                  | 0.030  | 40 |
| Recipient history of diabetes > 10 years              | 0.028  | 41 |
| Recipient female                                      | 0.028  | 42 |
| Recipient history of diabetes 0-5 years               | 0.026  | 43 |
| Recipient race Multiracial                            | -0.022 | 44 |
| Donor COD was anoxia                                  | 0.022  | 45 |
| Donor not given pre-recovery thyroxine                | 0.022  | 46 |
| Donor history of hypertension                         | 0.020  | 47 |
| Recipient unknown history of diabetes                 | 0.017  | 48 |
| Donor last serum sodium value                         | 0.016  | 49 |
| Donor unknown if given pre-recovery steroids          | -0.014 | 50 |
| Donor given pre-recovery steroids                     | 0.013  | 51 |
| Donor race Native American/Alaska Native              | -0.013 | 52 |
| Donor race Multiracial                                | -0.010 | 53 |
| Donor race Native Hawaiian/other Pacific Islander     | -0.010 | 54 |
| Donor unknown if given pre-recovery thyroxine         | -0.008 | 55 |
| Recipient race Native American/Alaska Native          | -0.008 | 56 |
| Donor/Recipient no weight mismatch                    | -0.006 | 57 |
| Donor unknown history of hypertension                 | -0.005 | 58 |
| Donor unknown history of diabetes                     | -0.004 | 59 |
| Donor history of MI                                   | 0.003  | 60 |
| Recipient history of diabetes 6-10 years              | -0.003 | 61 |
| Donor no history of diabetes                          | -0.002 | 62 |
| Center volume medium                                  | -0.002 | 63 |
| Donor/Recipient weight mismatch                       | 0.002  | 64 |
| Recipient unknown cigarette use                       | 0.001  | 65 |
| Recipient/Donor no sex mismatch                       | 0.000  | 66 |
| Recipient/Donor sex mismatch                          | 0.000  | 67 |
| Donor weight                                          | 0.000  | 68 |
| Donor BUN                                             | 0.000  | 69 |
| Recipient days on status 1B                           | 0.000  | 70 |
| Recipient height                                      | 0.000  | 71 |
| Recipient weight                                      | 0.000  | 72 |
| Donor/Recipient weight ratio                          | 0.000  | 73 |
| Center volume very low                                | 0.000  | 74 |

|                                                       |       |     |
|-------------------------------------------------------|-------|-----|
| Donor COD was cerebrovascular/stroke                  | 0.000 | 75  |
| Donor COD other                                       | 0.000 | 76  |
| Donor race White                                      | 0.000 | 77  |
| Donor race Black                                      | 0.000 | 78  |
| Donor blood type A                                    | 0.000 | 79  |
| Donor blood type B                                    | 0.000 | 80  |
| Donor history of cigarette use                        | 0.000 | 81  |
| Donor unknown history of cigarette use                | 0.000 | 82  |
| Donor no history of hypertension                      | 0.000 | 83  |
| Donor history of diabetes 0-5 years                   | 0.000 | 84  |
| Donor history of diabetes unknown years               | 0.000 | 85  |
| Donor no history of cocaine use                       | 0.000 | 86  |
| Donor unknown history of cocaine use                  | 0.000 | 87  |
| Donor no history of MI                                | 0.000 | 88  |
| Donor not given pre-recovery steroids                 | 0.000 | 89  |
| Donor given pre-recovery thyroxine                    | 0.000 | 90  |
| Donor PHS risk factors unknown                        | 0.000 | 91  |
| Donor no history heavy alcohol use                    | 0.000 | 92  |
| Donor unknown history of heavy alcohol use            | 0.000 | 93  |
| Recipient race White                                  | 0.000 | 94  |
| Recipient race Black                                  | 0.000 | 95  |
| Recipient blood type O                                | 0.000 | 96  |
| Recipient blood type A                                | 0.000 | 97  |
| Recipient no prior cardiac surgery at listing         | 0.000 | 98  |
| Recipient unknown if prior cardiac surgery at listing | 0.000 | 99  |
| Recipient had no history of diabetes                  | 0.000 | 100 |
| Recipient no cigarette use                            | 0.000 | 101 |
| Recipient cigarette use                               | 0.000 | 102 |
| Recipient no hypertension                             | 0.000 | 103 |
| Recipient hypertension                                | 0.000 | 104 |
| Donor ischemic time unknown                           | 0.000 | 105 |

LV: left ventricular, EF: ejection fraction, COD: cause of death, BMI: body mass index, PHS: public health service, MI: myocardial infarction, CNS: central nervous system

**Supplemental Table 3A:** Candidate and donor characteristics predictive of mortality or re-transplantation within 30 days

| <b>Characteristic</b>                         | <b>Standardized coefficient</b> | <b>Rank (Importance)</b> |
|-----------------------------------------------|---------------------------------|--------------------------|
| (Intercept)                                   | -4.232                          | 0                        |
| Donor ischemic time unknown                   | 0.160                           | 1                        |
| Recipient height                              | -0.127                          | 2                        |
| Recipient unknown cigarette use               | 0.088                           | 3                        |
| Recipient prior cardiac surgery at listing    | 0.082                           | 4                        |
| Donor history of cocaine use                  | 0.074                           | 5                        |
| Donor ischemic time < 4 hours                 | -0.066                          | 6                        |
| Donor did not have PHS risk factors           | -0.049                          | 7                        |
| Recipient race Asian                          | 0.047                           | 8                        |
| Recipient race Multiracial                    | 0.044                           | 9                        |
| Donor unknown history of cocaine use          | -0.036                          | 10                       |
| Recipient unknown history of diabetes         | 0.033                           | 11                       |
| Recipient no prior cardiac surgery at listing | -0.030                          | 12                       |
| Donor had PHS risk factors                    | 0.029                           | 13                       |
| Donor last serum sodium value                 | -0.029                          | 14                       |
| Donor no history of hypertension              | -0.028                          | 15                       |
| Donor blood type AB                           | 0.027                           | 16                       |
| Recipient weight                              | -0.023                          | 17                       |
| Center volume high                            | -0.019                          | 18                       |
| Donor unknown history of hypertension         | 0.013                           | 19                       |
| Recipient no hypertension                     | -0.013                          | 20                       |
| Donor LV EF 50 or less                        | 0.007                           | 21                       |
| Donor BMI                                     | 0.000                           | 22                       |
| Donor age                                     | 0.000                           | 23                       |
| Donor height                                  | 0.000                           | 24                       |
| Donor weight                                  | 0.000                           | 25                       |
| Donor BUN                                     | 0.000                           | 26                       |
| Donor creatinine                              | 0.000                           | 27                       |
| Donor total bilirubin                         | 0.000                           | 28                       |
| Recipient days on status 1                    | 0.000                           | 29                       |
| Recipient days on status 1B                   | 0.000                           | 30                       |
| Recipient days on status 2                    | 0.000                           | 31                       |
| Recipient days waiting                        | 0.000                           | 32                       |
| Recipient BMI                                 | 0.000                           | 33                       |

|                                                   |       |    |
|---------------------------------------------------|-------|----|
| Recipient age at listing                          | 0.000 | 34 |
| Donor/Recipient weight ratio                      | 0.000 | 35 |
| Center volume low                                 | 0.000 | 36 |
| Center volume very low                            | 0.000 | 37 |
| Center volume medium                              | 0.000 | 38 |
| Donor male                                        | 0.000 | 39 |
| Donor female                                      | 0.000 | 40 |
| Donor COD was head trauma                         | 0.000 | 41 |
| Donor COD was anoxia                              | 0.000 | 42 |
| Donor COD was cerebrovascular/stroke              | 0.000 | 43 |
| Donor COD other                                   | 0.000 | 44 |
| Donor COD was CNS tumor                           | 0.000 | 45 |
| Donor race Black                                  | 0.000 | 46 |
| Donor race White                                  | 0.000 | 47 |
| Donor race Hispanic                               | 0.000 | 48 |
| Donor race Asian                                  | 0.000 | 49 |
| Donor race Native American/Alaska Native          | 0.000 | 50 |
| Donor race Native Hawaiian/other Pacific Islander | 0.000 | 51 |
| Donor race Multiracial                            | 0.000 | 52 |
| Donor blood type A                                | 0.000 | 53 |
| Donor blood type O                                | 0.000 | 54 |
| Donor blood type B                                | 0.000 | 55 |
| Donor no history of cigarette use                 | 0.000 | 56 |
| Donor history of cigarette use                    | 0.000 | 57 |
| Donor unknown history of cigarette use            | 0.000 | 58 |
| Donor history of hypertension                     | 0.000 | 59 |
| Donor no history of diabetes                      | 0.000 | 60 |
| Donor history of diabetes 0-5 years               | 0.000 | 61 |
| Donor history of diabetes > 10 years              | 0.000 | 62 |
| Donor unknown history of diabetes                 | 0.000 | 63 |
| Donor history of diabetes 6-10 years              | 0.000 | 64 |
| Donor history of diabetes unknown years           | 0.000 | 65 |
| Donor no history of cocaine use                   | 0.000 | 66 |
| Donor no history of MI                            | 0.000 | 67 |
| Donor unknown history of MI                       | 0.000 | 68 |
| Donor history of MI                               | 0.000 | 69 |
| Donor not given pre-recovery steroids             | 0.000 | 70 |
| Donor given pre-recovery steroids                 | 0.000 | 71 |
| Donor unknown if given pre-recovery steroids      | 0.000 | 72 |
| Donor not given pre-recovery thyroxine            | 0.000 | 73 |
| Donor given pre-recovery thyroxine                | 0.000 | 74 |



|                                                       |       |     |
|-------------------------------------------------------|-------|-----|
| Donor unknown if given pre-recovery thyroxine         | 0.000 | 75  |
| Donor PHS risk factors unknown                        | 0.000 | 76  |
| Donor no history heavy alcohol use                    | 0.000 | 77  |
| Donor history of heavy alcohol use                    | 0.000 | 78  |
| Donor unknown history of heavy alcohol use            | 0.000 | 79  |
| Recipient male                                        | 0.000 | 80  |
| Recipient female                                      | 0.000 | 81  |
| Recipient race Hispanic                               | 0.000 | 82  |
| Recipient race White                                  | 0.000 | 83  |
| Recipient race Black                                  | 0.000 | 84  |
| Recipient race Native Hawaiian/other Pacific Islander | 0.000 | 85  |
| Recipient race Native American/Alaska Native          | 0.000 | 86  |
| Recipient blood type A                                | 0.000 | 87  |
| Recipient blood type O                                | 0.000 | 88  |
| Recipient blood type B                                | 0.000 | 89  |
| Recipient blood type AB                               | 0.000 | 90  |
| Recipient unknown if prior cardiac surgery at listing | 0.000 | 91  |
| Recipient had no history of diabetes                  | 0.000 | 92  |
| Recipient history of diabetes 6-10 years              | 0.000 | 93  |
| Recipient history of diabetes 0-5 years               | 0.000 | 94  |
| Recipient history of diabetes > 10 years              | 0.000 | 95  |
| Recipient history of diabetes unknown years           | 0.000 | 96  |
| Recipient no cigarette use                            | 0.000 | 97  |
| Recipient cigarette use                               | 0.000 | 98  |
| Donor LV EF greater than 50                           | 0.000 | 99  |
| Donor LV EF unknown                                   | 0.000 | 100 |
| Recipient and Donor identical blood type              | 0.000 | 101 |
| Recipient and Donor not identical blood type          | 0.000 | 102 |
| Recipient/Donor no sex mismatch                       | 0.000 | 103 |
| Recipient/Donor sex mismatch                          | 0.000 | 104 |
| Donor/Recipient no weight mismatch                    | 0.000 | 105 |
| Donor/Recipient weight mismatch                       | 0.000 | 106 |
| Recipient unknown hypertension status                 | 0.000 | 107 |
| Recipient hypertension                                | 0.000 | 108 |
| Donor ischemic time 4 or more hours                   | 0.000 | 109 |

LV: left ventricular, EF: ejection fraction, COD: cause of death, BMI: body mass index, PHS: public health service, MI: myocardial infarction, CNS: central nervous system

**Supplemental Table 3B:** Candidate and donor characteristics predictive of mortality or re-transplantation within 1 year

| <b>Characteristic</b>                             | <b>Standardized coefficient</b> | <b>Rank (Importance)</b> |
|---------------------------------------------------|---------------------------------|--------------------------|
| (Intercept)                                       | -1.771                          | 0                        |
| Recipient days on status 1B                       | 0.043                           | 1                        |
| Donor unknown history of cocaine use              | -0.036                          | 2                        |
| Donor no history of hypertension                  | -0.032                          | 3                        |
| Donor race Black                                  | 0.028                           | 4                        |
| Donor history of diabetes > 10 years              | -0.027                          | 5                        |
| Recipient history of diabetes 6-10 years          | 0.025                           | 6                        |
| Recipient history of diabetes 0-5 years           | -0.022                          | 7                        |
| Center volume medium                              | 0.022                           | 8                        |
| Recipient male                                    | -0.021                          | 9                        |
| Donor COD other                                   | 0.021                           | 10                       |
| Recipient female                                  | 0.020                           | 11                       |
| Donor COD was anoxia                              | 0.013                           | 12                       |
| Recipient unknown cigarette use                   | -0.013                          | 13                       |
| Center access rate                                | 0.013                           | 14                       |
| Recipient hypertension                            | 0.013                           | 15                       |
| Donor ischemic time 4 or more hours               | 0.013                           | 16                       |
| Recipient race Multiracial                        | 0.011                           | 17                       |
| Donor race Native Hawaiian/other Pacific Islander | -0.010                          | 18                       |
| Donor history of diabetes 0-5 years               | 0.010                           | 19                       |
| Donor creatinine                                  | -0.009                          | 20                       |
| Recipient no cigarette use                        | 0.008                           | 21                       |
| Donor unknown if given pre-recovery steroids      | -0.007                          | 22                       |
| Donor ischemic time unknown                       | -0.006                          | 23                       |
| Donor unknown history of cigarette use            | -0.005                          | 24                       |
| Donor COD was cerebrovascular/stroke              | -0.004                          | 25                       |
| Donor blood type O                                | -0.004                          | 26                       |
| Recipient weight                                  | -0.003                          | 27                       |
| Donor no history of cigarette use                 | 0.002                           | 28                       |
| Donor unknown history of hypertension             | 0.001                           | 29                       |
| Recipient/Donor no sex mismatch                   | 0.001                           | 30                       |
| Recipient/Donor sex mismatch                      | 0.000                           | 31                       |
| Donor BMI                                         | 0.000                           | 32                       |

|                                          |       |    |
|------------------------------------------|-------|----|
| Donor age                                | 0.000 | 33 |
| Donor height                             | 0.000 | 34 |
| Donor weight                             | 0.000 | 35 |
| Donor last serum sodium value            | 0.000 | 36 |
| Donor BUN                                | 0.000 | 37 |
| Donor total bilirubin                    | 0.000 | 38 |
| Recipient days on status 1               | 0.000 | 39 |
| Recipient days on status 2               | 0.000 | 40 |
| Recipient days waiting                   | 0.000 | 41 |
| Recipient BMI                            | 0.000 | 42 |
| Recipient age at listing                 | 0.000 | 43 |
| Recipient height                         | 0.000 | 44 |
| Donor/Recipient weight ratio             | 0.000 | 45 |
| Center volume high                       | 0.000 | 46 |
| Center volume low                        | 0.000 | 47 |
| Center volume very low                   | 0.000 | 48 |
| Donor male                               | 0.000 | 49 |
| Donor female                             | 0.000 | 50 |
| Donor COD was head trauma                | 0.000 | 51 |
| Donor COD was CNS tumor                  | 0.000 | 52 |
| Donor race White                         | 0.000 | 53 |
| Donor race Hispanic                      | 0.000 | 54 |
| Donor race Asian                         | 0.000 | 55 |
| Donor race Native American/Alaska Native | 0.000 | 56 |
| Donor race Multiracial                   | 0.000 | 57 |
| Donor blood type A                       | 0.000 | 58 |
| Donor blood type B                       | 0.000 | 59 |
| Donor blood type AB                      | 0.000 | 60 |
| Donor history of cigarette use           | 0.000 | 61 |
| Donor history of hypertension            | 0.000 | 62 |
| Donor no history of diabetes             | 0.000 | 63 |
| Donor unknown history of diabetes        | 0.000 | 64 |
| Donor history of diabetes 6-10 years     | 0.000 | 65 |
| Donor history of diabetes unknown years  | 0.000 | 66 |
| Donor no history of cocaine use          | 0.000 | 67 |
| Donor history of cocaine use             | 0.000 | 68 |
| Donor no history of MI                   | 0.000 | 69 |
| Donor unknown history of MI              | 0.000 | 70 |
| Donor history of MI                      | 0.000 | 71 |
| Donor not given pre-recovery steroids    | 0.000 | 72 |
| Donor given pre-recovery steroids        | 0.000 | 73 |
| Donor not given pre-recovery thyroxine   | 0.000 | 74 |
| Donor given pre-recovery thyroxine       | 0.000 | 75 |

|                                                       |       |     |
|-------------------------------------------------------|-------|-----|
| Donor unknown if given pre-recovery thyroxine         | 0.000 | 76  |
| Donor did not have PHS risk factors                   | 0.000 | 77  |
| Donor had PHS risk factors                            | 0.000 | 78  |
| Donor PHS risk factors unknown                        | 0.000 | 79  |
| Donor no history heavy alcohol use                    | 0.000 | 80  |
| Donor history of heavy alcohol use                    | 0.000 | 81  |
| Donor unknown history of heavy alcohol use            | 0.000 | 82  |
| Recipient race Hispanic                               | 0.000 | 83  |
| Recipient race White                                  | 0.000 | 84  |
| Recipient race Black                                  | 0.000 | 85  |
| Recipient race Asian                                  | 0.000 | 86  |
| Recipient race Native Hawaiian/other Pacific Islander | 0.000 | 87  |
| Recipient race Native American/Alaska Native          | 0.000 | 88  |
| Recipient blood type A                                | 0.000 | 89  |
| Recipient blood type O                                | 0.000 | 90  |
| Recipient blood type B                                | 0.000 | 91  |
| Recipient blood type AB                               | 0.000 | 92  |
| Recipient prior cardiac surgery at listing            | 0.000 | 93  |
| Recipient no prior cardiac surgery at listing         | 0.000 | 94  |
| Recipient unknown if prior cardiac surgery at listing | 0.000 | 95  |
| Recipient had no history of diabetes                  | 0.000 | 96  |
| Recipient history of diabetes > 10 years              | 0.000 | 97  |
| Recipient unknown history of diabetes                 | 0.000 | 98  |
| Recipient history of diabetes unknown years           | 0.000 | 99  |
| Recipient cigarette use                               | 0.000 | 100 |
| Donor LV EF greater than 50                           | 0.000 | 101 |
| Donor LV EF 50 or less                                | 0.000 | 102 |
| Donor LV EF unknown                                   | 0.000 | 103 |
| Recipient and Donor identical blood type              | 0.000 | 104 |
| Recipient and Donor not identical blood type          | 0.000 | 105 |
| Donor/Recipient no weight mismatch                    | 0.000 | 106 |
| Donor/Recipient weight mismatch                       | 0.000 | 107 |
| Recipient no hypertension                             | 0.000 | 108 |
| Recipient unknown hypertension status                 | 0.000 | 109 |
| Donor ischemic time < 4 hours                         | 0.000 | 110 |

LV: left ventricular, EF: ejection fraction, COD: cause of death, BMI: body mass index, PHS: public health service, MI: myocardial infarction, CNS: central nervous system

**Supplemental Figure 1:** Conditional inference tree analysis for donor heart *offer* acceptance

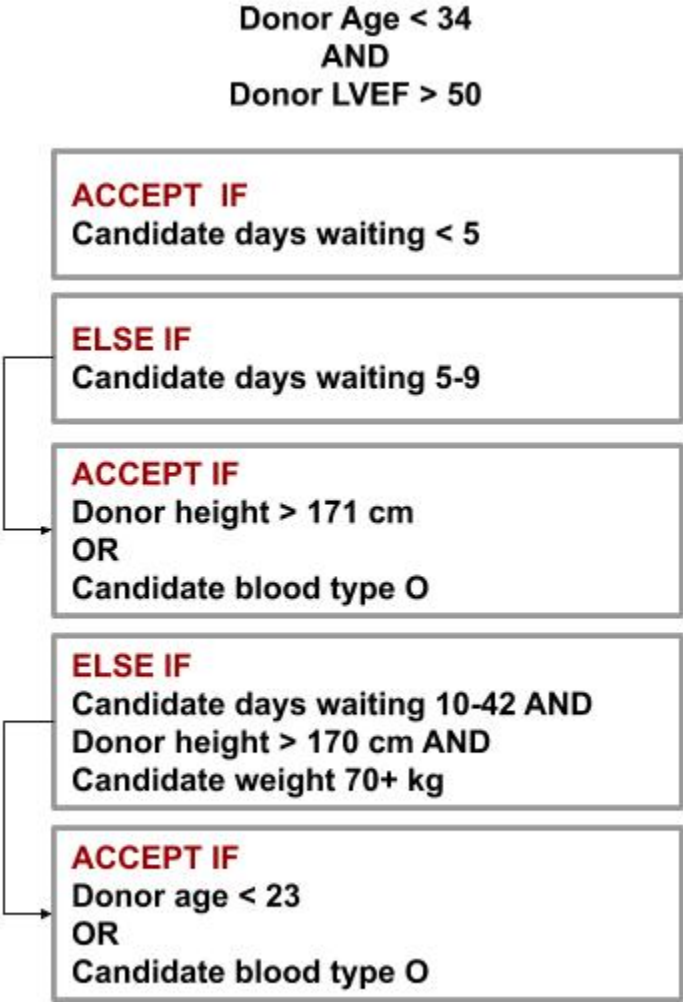

**Supplemental Figure 2:** Conditional inference tree analysis for donor heart *organ* acceptance

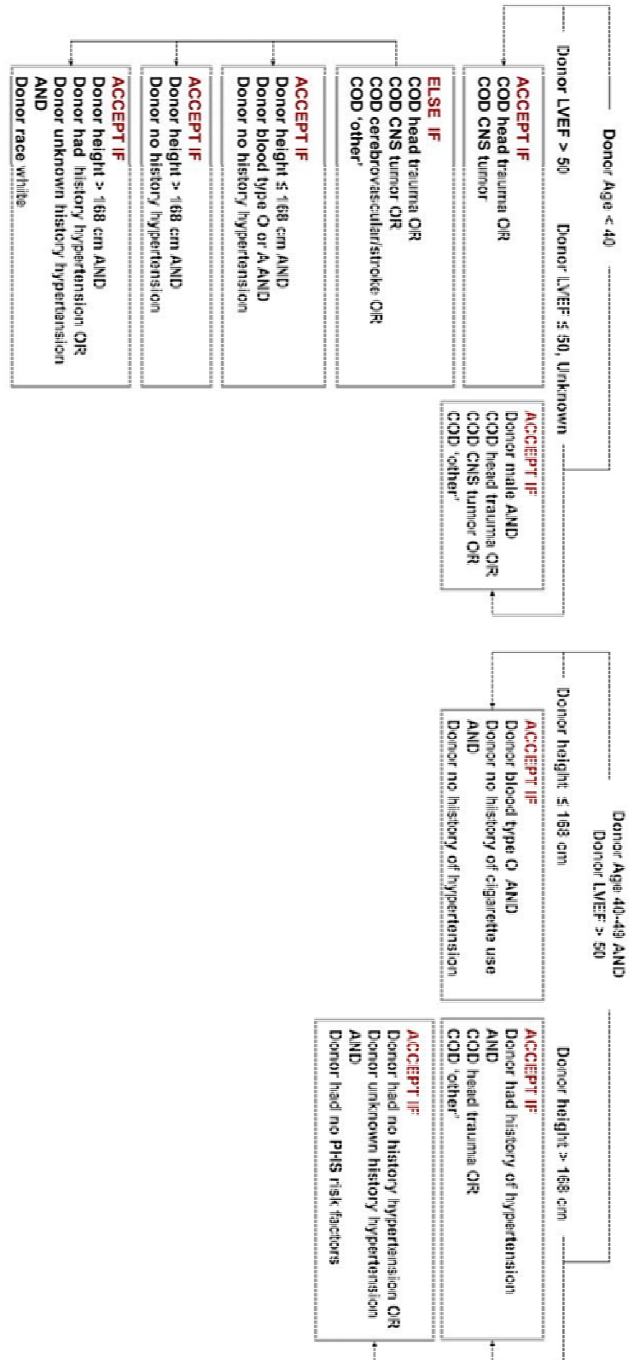

**Supplemental Figure 3:** Conditional inference tree analysis for *organ sequence number*

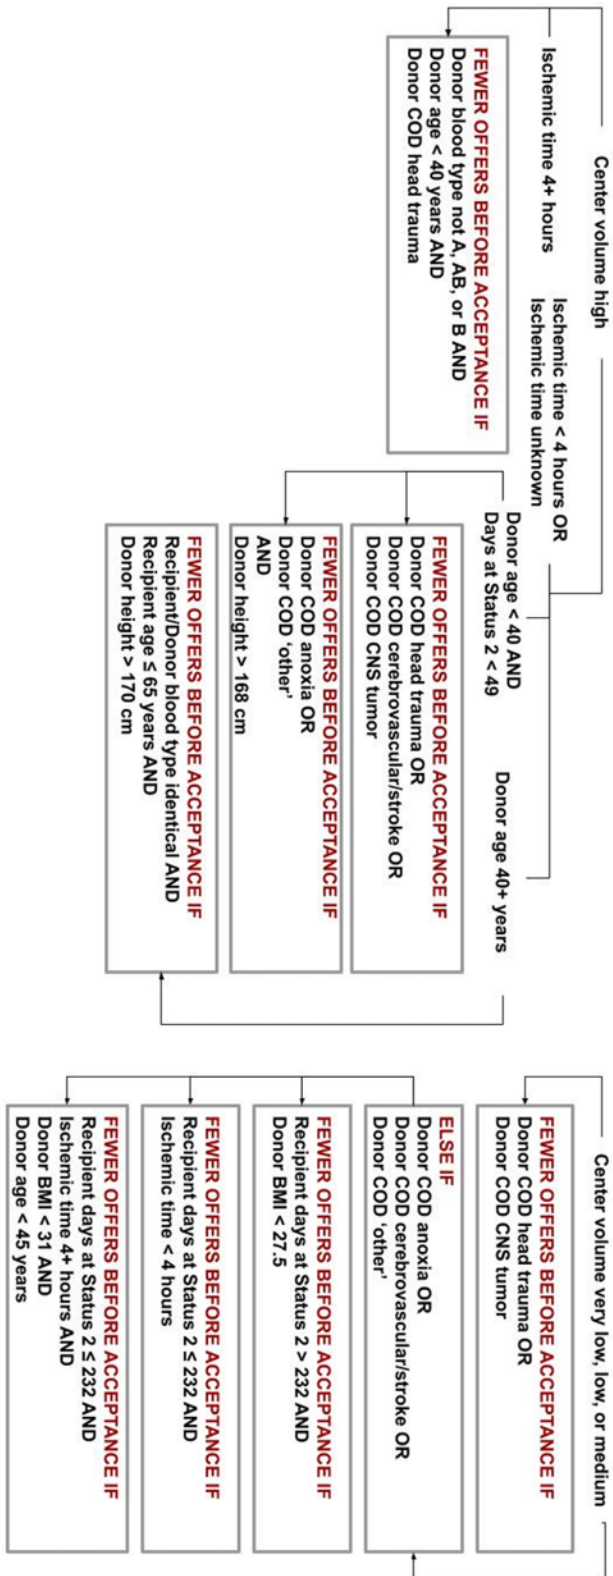

**Supplemental Figure 4:** Donor and candidate characteristics predictive of *offer* acceptance, demonstrating heterogeneity in consistency across transplant centers. BMI: body mass index, LV: left ventricular, EF: ejection fraction

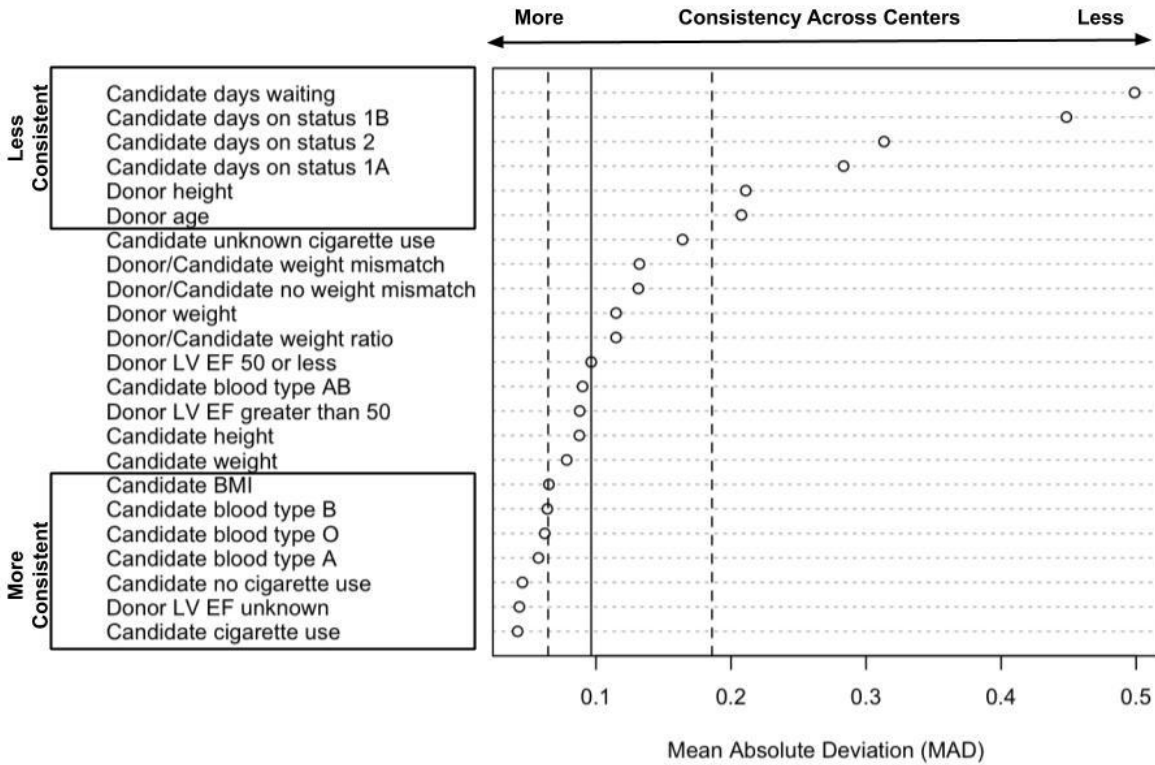



**Supplemental Figure 5:** Donor characteristics that were predictive of *organ* acceptance, demonstrating heterogeneity in consistency across transplant centers. BUN: blood urea nitrogen, BMI: body mass index, LV: left ventricular, EF: ejection fraction, COD: cause of death, CNS: central nervous system, PHS: public health service, MI: myocardial infarction

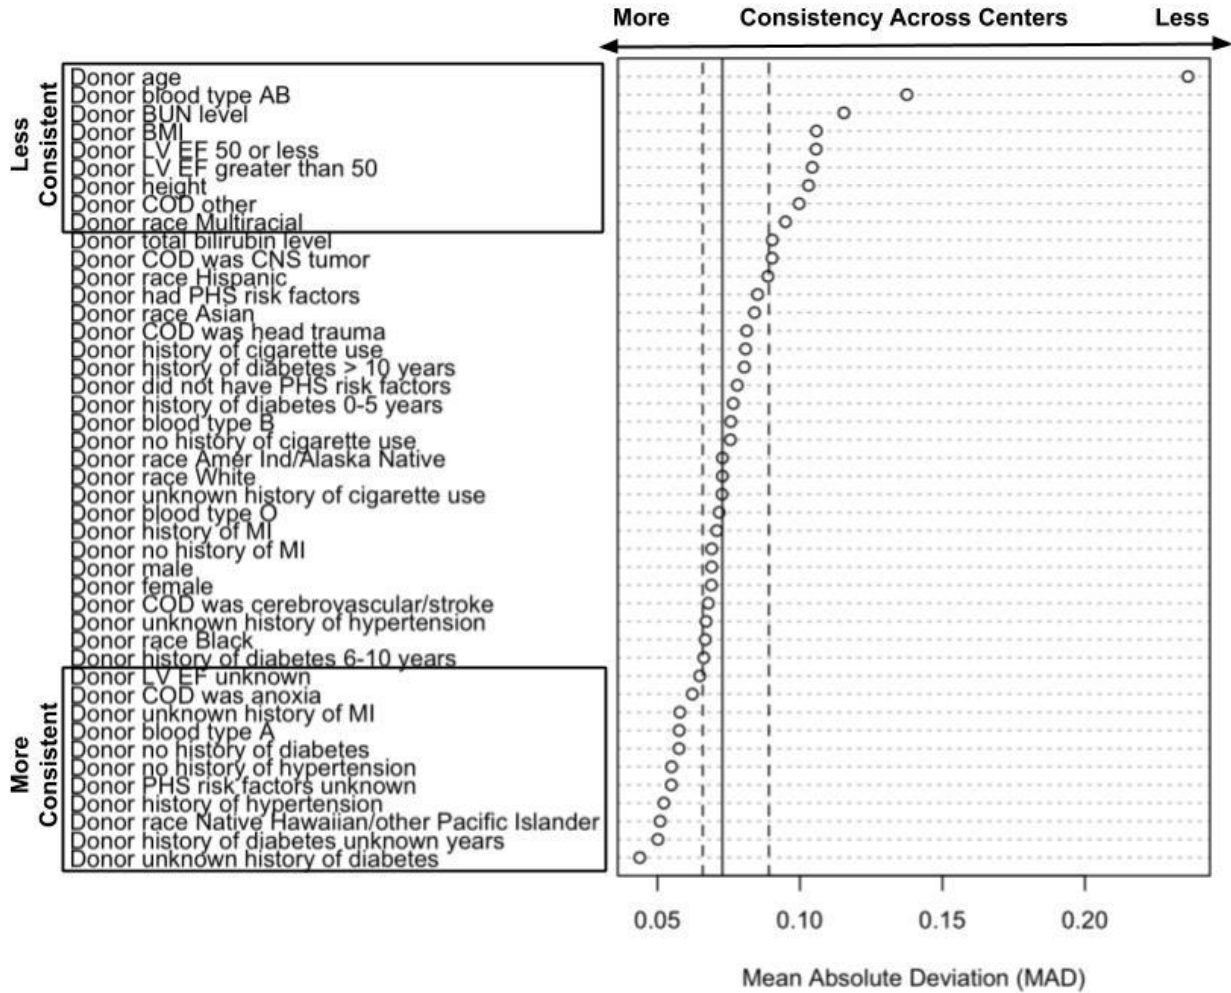

**Supplemental Figure 6:** Donor and candidate characteristics that were predictive of *organ sequence number*, demonstrating great heterogeneity between transplant centers. COD: cause of death, BMI: body mass index; CNS: central nervous system

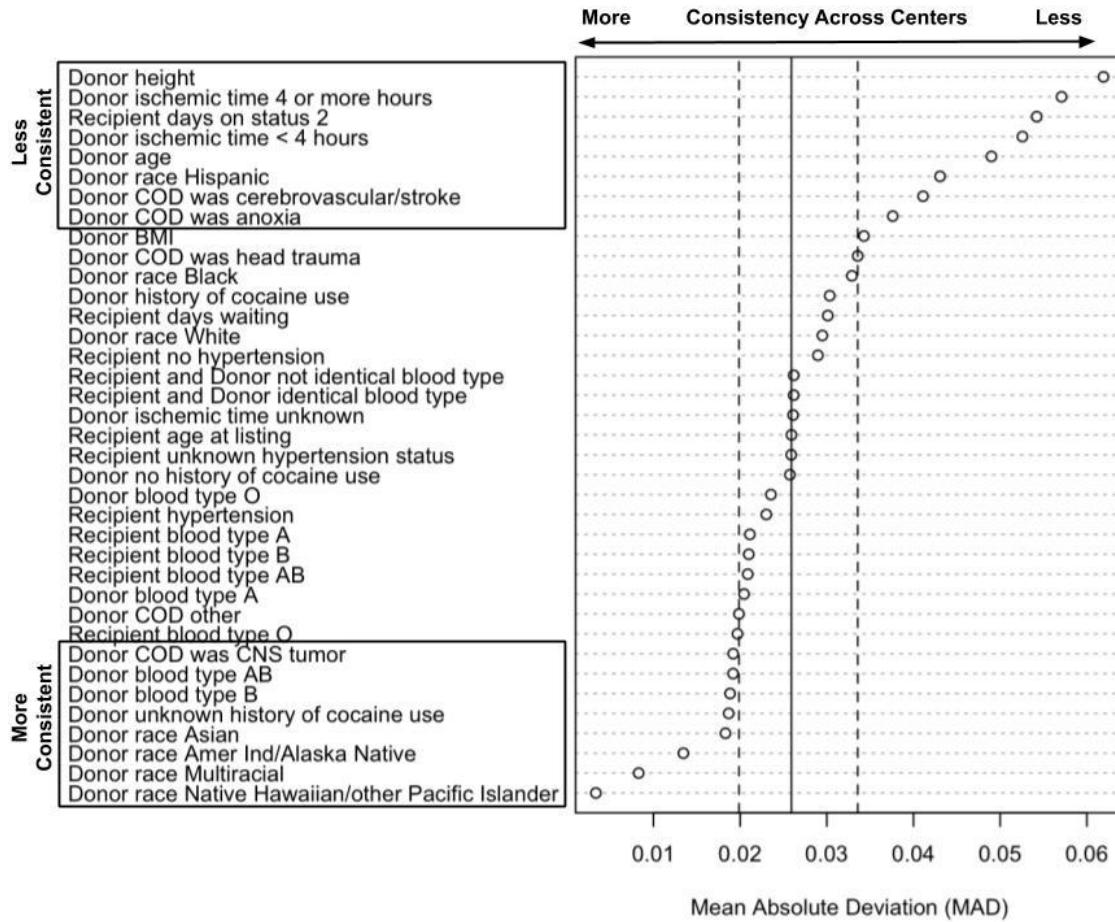

Supplement: NIHMS1065837-supplement-supp_info.pdf [file NIHMS1065837-supplement-supp_info.pdf]
